# Supplementary material
Source: HighWire-hosted journal article supplement (http://www.qdcxjkg.com/highwire/filestream/128975/field_highwire_adjunct_files/1/ERJ-01642-2015_Table_S2.pdf)
Supplement: ERJ-01642-2015_Table_S2.pdf [file ERJ-01642-2015_Table_S2.pdf]

**Supplementary Table S2. A Comparison of EC<sub>50</sub> and Efficacy of CXCR3 agonists and CCL5 on migratory responses of PBMC from non-smokers, smokers and patients with COPD.**

|        |            | EC <sub>50</sub> nM | Maximal concentration nM |
|--------|------------|---------------------|--------------------------|
| CXCL9  | Non-smoker | 2.7 ± 0.6           | 33.1 ± 11.3              |
|        | Smoker     | 4.1 ± 0.8           | 31.9 ± 3.7               |
|        | COPD       | 3.3 ± 0.4           | 51.9 ± 12.9              |
| CXCL10 | Non-smoker | 2.8 ± 0.6           | 24.6 ± 5.2               |
|        | Smoker     | 2.3 ± 0.4           | 29.9 ± 2.0               |
|        | COPD       | 2.3 ± 0.5           | 25.0 ± 2.9               |
| CXCL11 | Non-smoker | 2.7 ± 0.6           | 27.5 ± 3.6               |
|        | Smoker     | 3.5 ± 0.9           | 28.7 ± 2.6               |
|        | COPD       | 2.4 ± 0.6           | 31.0 ± 2.1               |
| CCL5   | Non-smoker | 2.7 ± 0.6           | 46.6 ± 15.4              |
|        | Smoker     | 7.5 ± 2.4           | 25.4 ± 3.5               |
|        | COPD       | 5.6 ± 2.8           | 32.3 ± 6.5               |

Data are presented as mean ± SEM where n = 6-10.
